# Supplementary material for: Endosulfan inducing blood hypercoagulability and endothelial cells apoptosis via the death receptor pathway in Wistar rats
Source: Royal Society of Chemistry journal article supplement (doi:10.1039/c5tx00036j), 2015-01-01
Supplement: c5tx00036j1.pdf [file c5tx00036j1.pdf]

### Highlights

1. Endosulfan induced blood hypercoagulability in rat.
2. Endosulfan promoted platelet aggregation and transformation of fibrinogen into fibrin.
3. Apoptosis of endothelial cells via death receptor pathway from oxidative stress involved in endosulfan induced dysfunction of endothelial cells.
4. Exposure to endosulfan could be a potential hazardous factor to the cardiovascular system.
